# Supplementary material for: Ga and In-based hybrid halide perovskites as an alternative to Pb: a first principles study
Source: Royal Society of Chemistry journal article supplement (doi:10.1039/d4cp00734d), 2024-01-01
Supplement: d4cp00734d1.pdf [file d4cp00734d1.pdf]

## Supporting Information

# Ga and In-based hybrid halide perovskites as an alternative to Pb: A first principles study

Tridip Chutia<sup>1,4</sup>, Tanmoy Kalita<sup>2</sup>, Uddipana Saikia<sup>3</sup> and Dhruba Jyoti Kalita<sup>1</sup>,

a)

<sup>1, 2, 3</sup>Department of Chemistry, Gauhati University

<sup>4</sup>Department of Chemistry, Bhattadev University, Pathsala, Bajali-781325, India.

Electronic mail: [dhrubajyoti.kalita@gauhati.ac.in](mailto:dhrubajyoti.kalita@gauhati.ac.in)

**Table S1: Optimized coordinates (X Y Z) of the studied compounds (in Angstroms):**

**(MA)<sub>3</sub> (Ga<sub>.25</sub> In<sub>.75</sub>)<sub>2</sub> I<sub>9</sub>**

|    |               |               |               |
|----|---------------|---------------|---------------|
| Ga | 1.1207047063  | 0.7225721577  | 0.5741959219  |
| Ga | 1.1601235704  | 5.8991942225  | 6.8513562670  |
| In | 6.1786332122  | 12.3712608489 | 6.9419889732  |
| In | 12.5788278817 | 12.5560457586 | 11.9162486684 |
| In | 7.5750386461  | 1.0701276845  | 5.3517465753  |
| In | 7.4672219894  | 5.8047937277  | 11.7904767085 |
| In | 12.3363853773 | 7.3641672376  | 5.7894446455  |
| In | 6.0850321689  | 7.4438693899  | 0.5067316464  |
| H  | 4.1159187393  | 10.5850522877 | 2.7602066786  |
| H  | 2.9046422129  | 9.3257656993  | 2.3342299258  |
| H  | 10.4406025064 | 9.3185121853  | 2.9970429628  |
| H  | 10.7397851460 | 3.5129674252  | 7.9901581271  |
| H  | 9.3071947817  | 4.6016267186  | 3.5924422814  |
| H  | 9.0124443250  | 3.2578639128  | 2.4295691009  |
| H  | 10.1742130712 | 10.6135022155 | 1.7821572006  |
| H  | 4.2859419092  | 1.9814683169  | 9.3396581107  |
| H  | 8.9283556904  | 10.3969084147 | 10.5839825768 |
| H  | 7.9924746451  | 9.2041114721  | 9.6106911684  |
| H  | 4.5399665760  | 3.7464320378  | 9.5676799862  |
| H  | 4.8518263591  | 4.5283177525  | 2.6657988238  |
| H  | 10.6352553283 | 4.5230684617  | 9.4801365045  |
| H  | 4.0772282153  | 10.6942129720 | 10.3024402721 |
| H  | 4.0481821442  | 9.0361837085  | 3.6774450979  |
| H  | 10.6348042879 | 11.0385015134 | 3.4638685555  |
| H  | 3.3193388956  | 3.1663599964  | 8.3820290039  |
| H  | 9.1474809719  | 4.1446683038  | 8.5421184682  |

|   |               |               |               |
|---|---------------|---------------|---------------|
| H | 9.8337784280  | 4.7653055201  | 1.8821803951  |
| H | 4.5830610663  | 2.8408643309  | 2.1133779101  |
| H | 3.1710367800  | 10.2876689958 | 8.8205332195  |
| H | 4.6484478835  | 9.3708592442  | 9.2413739341  |
| H | 9.3706701956  | 8.6469923571  | 10.6219097738 |
| H | 3.2334958727  | 4.0338669058  | 2.0680089973  |
| H | 9.3694209166  | 2.7355828722  | 10.5537464047 |
| H | 2.0449352407  | 9.3408864179  | 10.7301971740 |
| H | 9.9255618653  | 8.8253504492  | 8.2188028384  |
| H | 1.9865373189  | 2.2977321837  | 10.1875762454 |
| H | 4.5973027990  | 3.0995032012  | 4.5724397010  |
| H | 11.6692773722 | 4.2400894162  | 3.3885904758  |
| H | 3.2756109735  | 4.1032847853  | 4.5027129102  |
| H | 10.9440091840 | 2.7736456833  | 3.8342549104  |
| H | 9.6224553148  | 10.4666313318 | 8.2666744130  |
| H | 8.0834901955  | 9.6245847994  | 2.7942923858  |
| H | 2.2951310379  | 3.9135010852  | 10.4722165142 |
| H | 3.4090783603  | 8.5414893977  | 11.2563156170 |
| H | 8.4738131647  | 10.3053807386 | 4.2403077565  |
| C | 3.8029600450  | 2.9664663812  | 9.3462526477  |
| C | 9.6948393227  | 4.0674986238  | 2.7168641236  |
| H | 1.8752180644  | 11.1275207400 | 3.6548908667  |
| C | 8.9791113623  | 9.4676337744  | 10.0060393598 |
| H | 1.8645740740  | 9.7294770407  | 4.5675900029  |
| H | 3.1286316769  | 2.7066941952  | 11.3338848699 |
| C | 3.4591830238  | 9.7996249429  | 3.1537943348  |
| H | 10.8800664865 | 9.8327943657  | 9.1827446124  |
| C | 3.7686759112  | 9.8831162639  | 9.6402618191  |
| C | 4.1292973113  | 3.7085112531  | 2.6076305065  |
| C | 10.0725338537 | 10.3365606460 | 2.8377654002  |
| H | 2.9677434411  | 10.9359022043 | 4.8882239326  |
| H | 10.8460095451 | 2.1224096042  | 9.9728905296  |
| C | 10.1279632842 | 3.7709710764  | 8.8629722012  |
| H | 11.4936605073 | 3.0438633286  | 2.2513058663  |
| H | 9.4179440523  | 1.8010123932  | 9.1806576330  |
| H | 2.6643778328  | 8.0828326329  | 9.8556441722  |
| H | 3.0973787704  | 2.5209643473  | 4.0111280523  |
| H | 8.1858578732  | 11.3054406843 | 2.9198183245  |
| N | 2.9447618911  | 8.9185182588  | 10.4056968887 |
| N | 3.7460415522  | 3.3243265268  | 3.9985553902  |
| N | 8.6309136893  | 10.4030917722 | 3.2163478180  |
| N | 2.7505618982  | 2.9762312413  | 10.4058830583 |
| N | 9.9084945635  | 9.6654240192  | 8.8491347946  |
| N | 11.0287748596 | 3.4851753336  | 3.0696540466  |
| N | 9.9303804213  | 2.5398701386  | 9.6944310616  |
| N | 2.4930878278  | 10.4149815656 | 4.1116681332  |
| I | 9.9246226460  | 13.0998644486 | 12.5674504981 |
| I | 7.1653664082  | 0.6052837081  | 2.6046964028  |
| I | 13.0726872508 | 13.7971590491 | 9.3896168743  |
| I | 6.9106526919  | 12.8834659474 | 9.5782978058  |
| I | 3.5519125966  | 6.5497879512  | 6.0293394042  |
| I | 9.7222367141  | 6.8053132827  | 6.5857381416  |

|   |               |               |               |
|---|---------------|---------------|---------------|
| I | 6.4766330534  | 6.3647609778  | 9.2154813359  |
| I | 7.1153759605  | 3.0448466624  | 12.0852529425 |
| I | 12.6363085365 | 10.1487735548 | 6.3025631133  |
| I | 6.3771460463  | 10.1881229099 | 0.0516095910  |
| I | 1.0545000157  | 5.9794874442  | 9.5278760451  |
| I | 12.4989955426 | 6.9629138372  | 3.0084326544  |
| I | 3.2775687847  | 6.9500372120  | 0.3326507390  |
| I | 10.3655226661 | 1.0620502021  | 5.7556785601  |
| I | 6.9174551222  | 7.1515824724  | 3.1810259487  |
| I | 12.6670530192 | 9.7969624007  | 11.2868461147 |
| I | 6.7255741772  | 3.6828506607  | 5.8374593814  |
| I | 0.7806251902  | 0.3352260885  | 3.1694209941  |
| I | 3.6561614537  | 0.4932939097  | -0.0000397402 |
| I | 10.2500185115 | 6.1726926743  | 12.0964539771 |
| I | 0.4848409960  | 3.2999244083  | 0.3414538338  |
| I | 0.7448864536  | 3.3830530058  | 6.1441943344  |
| I | 3.3855561907  | 12.6672763436 | 6.7294505649  |
| I | 6.7919295039  | 9.7051023570  | 6.3912272087  |

**(MA)<sub>3</sub>(Ga<sub>.50</sub>In<sub>.50</sub>)<sub>2</sub>I<sub>9</sub>**

|    |               |               |               |
|----|---------------|---------------|---------------|
| In | 0.9517276001  | 0.5267131924  | 0.6086413992  |
| In | 0.9160416408  | 6.0779464757  | 6.7131343632  |
| Ga | 5.9162236422  | 12.3521723795 | 6.9056057477  |
| Ga | 12.4867752846 | 12.5226573860 | 11.7981303194 |
| In | 7.4643600121  | 0.9365303987  | 5.5965648385  |
| In | 7.4395382862  | 5.8934818633  | 11.8876488442 |
| Ga | 12.3212004507 | 7.7978823883  | 5.6264876545  |
| Ga | 6.0920515436  | 7.3029506688  | 0.5923507946  |
| H  | 4.0176428780  | 10.8852813328 | 2.7281389841  |
| H  | 2.9750964581  | 9.5340916295  | 2.1696891611  |
| H  | 10.5237028352 | 9.4193875748  | 2.5820270300  |
| H  | 10.9406110814 | 3.7834177110  | 8.1934817224  |
| H  | 9.3016269579  | 4.4320308293  | 3.6663464345  |
| H  | 9.0459931640  | 3.5834594279  | 2.1090089195  |
| H  | 10.0752948158 | 10.9549671949 | 1.7478505000  |
| H  | 4.3120710995  | 2.0309235384  | 9.5717083252  |
| H  | 8.7024335530  | 10.4657530211 | 10.4053753952 |
| H  | 8.0883485706  | 9.2085972878  | 9.2702387762  |
| H  | 4.3929330597  | 3.8233069599  | 9.4381742568  |
| H  | 5.1156647430  | 4.0768671894  | 2.6320387981  |
| H  | 10.3568360233 | 4.5995589191  | 9.6986414606  |
| H  | 4.1493596423  | 10.6455008369 | 10.1299160126 |
| H  | 4.2898722109  | 9.2176573547  | 3.3331563551  |
| H  | 10.6488145308 | 10.9856666849 | 3.4539170978  |
| H  | 3.1705168821  | 2.9073775110  | 8.4868723672  |
| H  | 9.1991711247  | 4.1931454447  | 8.3810280497  |
| H  | 10.2821277945 | 4.8819972342  | 2.2215216128  |
| H  | 4.3661413772  | 2.4668859544  | 2.3562040749  |
| H  | 3.1440864840  | 10.0709700751 | 8.7693395626  |
| H  | 4.6575448520  | 9.2162590738  | 9.1914185462  |
| H  | 9.4126716314  | 8.8150752072  | 10.4190749114 |

|   |               |               |               |
|---|---------------|---------------|---------------|
| H | 3.3919206750  | 3.9626754292  | 2.1593158952  |
| H | 9.1213527134  | 2.5675735094  | 10.2559270977 |
| H | 2.1853518833  | 9.3342585053  | 10.8671711047 |
| H | 10.0726665808 | 9.3123464189  | 8.0126194900  |
| H | 1.9938585461  | 2.3633769234  | 10.4821214188 |
| H | 4.5974096239  | 3.1321442544  | 4.7754116186  |
| H | 11.4107897740 | 3.3277300113  | 3.9364419587  |
| H | 3.5520962865  | 4.3877768131  | 4.5301332478  |
| H | 10.3977824228 | 2.1244234892  | 3.3583393796  |
| H | 9.7415500826  | 10.9164324675 | 8.3298406627  |
| H | 8.0952889246  | 9.7060365445  | 2.5172111882  |
| H | 2.2541008160  | 4.0148886152  | 10.4834960620 |
| H | 3.6009397845  | 8.5646077226  | 11.3376706407 |
| H | 8.5920860825  | 9.8387193817  | 4.1098998663  |
| C | 3.7295546229  | 2.9500812228  | 9.4295286674  |
| C | 9.7891683761  | 4.0613160114  | 2.7576514018  |
| H | 1.8017848299  | 10.8042186303 | 3.8502434688  |
| C | 8.9693862301  | 9.5976798692  | 9.7938545174  |
| H | 2.2063242643  | 9.3168152901  | 4.5141661222  |
| H | 3.1755417475  | 2.9983594023  | 11.4771720597 |
| C | 3.5381468767  | 9.9438227976  | 3.0128736146  |
| H | 10.9282716168 | 10.1284430880 | 9.2122464895  |
| C | 3.8013013847  | 9.7629519367  | 9.5889019334  |
| C | 4.1978426257  | 3.4839895135  | 2.7268221914  |
| C | 10.0821012580 | 10.4168532579 | 2.7058685677  |
| H | 3.0587637756  | 10.6967512714 | 4.9295980557  |
| H | 10.7455521889 | 2.1846299743  | 9.9728774803  |
| C | 10.1101058158 | 3.8800405521  | 8.9054889404  |
| H | 11.4923296175 | 2.8955419053  | 2.3231928614  |
| H | 9.6221232530  | 1.8395822496  | 8.8005013630  |
| H | 2.7301608230  | 7.9993574734  | 10.0448411916 |
| H | 2.9890938371  | 2.8257102703  | 4.3404199910  |
| H | 8.2154494026  | 11.2237546736 | 3.2135864372  |
| N | 3.0498200221  | 8.8728850694  | 10.5118238698 |
| N | 3.8035659822  | 3.4374301136  | 4.1664703896  |
| N | 8.6664127370  | 10.2776048390 | 3.1740791286  |
| N | 2.7409817613  | 3.0908016721  | 10.5440132307 |
| N | 9.9871714910  | 10.0181186539 | 8.7789962100  |
| N | 10.8275039548 | 3.0379392491  | 3.1228579286  |
| N | 9.8755533475  | 2.5410495718  | 9.5297651256  |
| N | 2.5999525418  | 10.1952471709 | 4.1407509336  |
| I | 9.9497632100  | 12.9537953553 | 12.2059082089 |
| I | 7.7000449736  | 0.6486799673  | 2.7736873844  |
| I | 13.1490929218 | 13.8233197188 | 9.5609467652  |
| I | 6.5869458160  | 12.7465434979 | 9.4080122868  |
| I | 3.5495400814  | 6.5851347896  | 5.8565646030  |
| I | 9.7715917087  | 7.4466238010  | 6.1206798980  |
| I | 6.4517198426  | 6.4695921097  | 9.3190431090  |
| I | 7.1878193443  | 3.0772473051  | 12.0416814182 |
| I | 12.9037092243 | 10.2218743106 | 6.4931861142  |
| I | 6.3763633514  | 9.9217303207  | 0.2024929601  |
| I | 0.9648132370  | 6.0410014909  | 9.5747263661  |

|   |               |               |               |
|---|---------------|---------------|---------------|
| I | 12.8242948766 | 7.6280244623  | 3.0612581412  |
| I | 3.4604937951  | 6.8274001633  | 0.3897398306  |
| I | 10.1494350470 | 0.5907887372  | 6.4537513487  |
| I | 6.8076096117  | 6.9198890970  | 3.0861856051  |
| I | 12.7439057938 | 9.9558997808  | 11.2234471796 |
| I | 6.8546466150  | 3.6429135782  | 6.0274390504  |
| I | 0.4375747073  | -0.0880199077 | 3.3002715761  |
| I | 3.6796273007  | 0.4180692144  | 0.0394674314  |
| I | 10.2068313024 | 6.3425128772  | 12.1430427478 |
| I | 0.3138283952  | 3.3037299638  | 0.5391502462  |
| I | 0.4440193875  | 3.3974850007  | 5.8497511792  |
| I | 3.3438002704  | 12.8302358750 | 6.6232450117  |
| I | 6.2823003763  | 9.8405689305  | 6.2416604207  |

**(MA)<sub>3</sub>(Ga<sub>.75</sub>In<sub>.25</sub>)<sub>2</sub>I<sub>9</sub>**

|    |               |               |               |
|----|---------------|---------------|---------------|
| Ga | 1.1225026776  | 0.7562584468  | 0.5079360145  |
| Ga | 1.0470719858  | 5.8312302508  | 6.7341046652  |
| Ga | 6.3277968410  | 12.4682550373 | 6.8591475427  |
| Ga | 12.5582823870 | 12.8029241545 | 12.0051298433 |
| Ga | 7.5416112649  | 0.9034549164  | 5.3591786964  |
| Ga | 7.4794418808  | 5.7531872856  | 11.8163275346 |
| In | 12.4773776107 | 7.5616575851  | 5.6311027027  |
| In | 6.2168111811  | 7.2627435327  | 0.4979717745  |
| H  | 4.1427350555  | 10.4463814660 | 2.6375377849  |
| H  | 2.7615266372  | 9.3153477517  | 2.4791340764  |
| H  | 10.5797283155 | 9.6269373769  | 2.4223078089  |
| H  | 10.6612827271 | 3.2706864687  | 7.9563018924  |
| H  | 9.5069463310  | 4.4765010694  | 3.7794229941  |
| H  | 8.8239169993  | 3.4838318180  | 2.4581664146  |
| H  | 9.9761740436  | 11.2456186783 | 1.9149775521  |
| H  | 4.2783235611  | 1.9189226177  | 9.7557862539  |
| H  | 8.9715698889  | 10.3285433182 | 10.6501459218 |
| H  | 8.0323288328  | 9.3184559242  | 9.4998412610  |
| H  | 4.5425870668  | 3.6801065207  | 9.5343990945  |
| H  | 4.8044719475  | 4.4674227465  | 2.7595304945  |
| H  | 10.6647551907 | 4.3786558357  | 9.3744385292  |
| H  | 4.1493255397  | 10.6437069771 | 10.3823559542 |
| H  | 4.0264562026  | 9.0139351820  | 3.7080973279  |
| H  | 10.5886377431 | 10.9935523428 | 3.5795769540  |
| H  | 3.3497205646  | 2.8111428697  | 8.5097858149  |
| H  | 9.1699905337  | 4.1621790961  | 8.4157635551  |
| H  | 9.9822303487  | 4.7956128275  | 2.0781512706  |
| H  | 4.5957782226  | 2.8090189615  | 2.1043048321  |
| H  | 3.2565404405  | 10.3512224587 | 8.8505094470  |
| H  | 4.6265873366  | 9.2784615483  | 9.3117279569  |
| H  | 9.4430774021  | 8.6206314959  | 10.3628329582 |
| H  | 3.1904715024  | 3.9261511829  | 2.1831915045  |
| H  | 9.1949488473  | 2.8584122963  | 10.5420145241 |
| H  | 1.9989409522  | 9.4948115276  | 10.7559375239 |
| H  | 9.9501035164  | 9.2421960248  | 8.0271632738  |
| H  | 1.9587232727  | 2.4493361475  | 10.4314071678 |

|   |               |               |               |
|---|---------------|---------------|---------------|
| H | 4.6787661063  | 2.8742303912  | 4.5539014517  |
| H | 11.7126117921 | 3.5237468984  | 3.2267313537  |
| H | 3.3699568941  | 3.8919591798  | 4.6135426438  |
| H | 10.6358887059 | 2.3212680622  | 3.6634755607  |
| H | 9.5698445647  | 10.8425792323 | 8.3769769073  |
| H | 8.1177708410  | 9.7960854228  | 2.3794090907  |
| H | 2.2845795720  | 4.0836381887  | 10.3185268078 |
| H | 3.2685648289  | 8.5130053105  | 11.2477857656 |
| H | 8.6644390706  | 9.4553099184  | 3.9366134377  |
| C | 3.8044979809  | 2.8718464051  | 9.5031655394  |
| C | 9.7092582884  | 4.0243808247  | 2.8046171864  |
| H | 2.1083704771  | 11.3337082113 | 3.6940068421  |
| C | 9.0257845848  | 9.5257244988  | 9.9089482349  |
| H | 2.0040930179  | 10.0295271603 | 4.7174751668  |
| H | 3.0723958735  | 3.1285194994  | 11.4666586653 |
| C | 3.4592825920  | 9.7855393085  | 3.1785160295  |
| H | 10.8876716458 | 10.1214226778 | 9.1291890553  |
| C | 3.7889241355  | 9.8793948656  | 9.6848142869  |
| C | 4.1200368708  | 3.6163413523  | 2.6707003688  |
| C | 10.0540978323 | 10.5325283498 | 2.7430782377  |
| H | 3.2795887124  | 11.0894791550 | 4.8553459889  |
| H | 10.5307297823 | 2.0014893138  | 9.9677649873  |
| C | 10.0724485854 | 3.6688469502  | 8.7885539799  |
| H | 11.0403396345 | 2.5718503489  | 2.0448387765  |
| H | 9.0385554001  | 1.8624840638  | 9.2228495340  |
| H | 2.4796241421  | 8.2093744382  | 9.8179297298  |
| H | 3.1575797350  | 2.3238238206  | 4.0435661323  |
| H | 8.1565828392  | 11.0064583761 | 3.5055968847  |
| N | 2.8424628901  | 8.9845653813  | 10.4114981802 |
| N | 3.8031411979  | 3.1318215031  | 4.0465521071  |
| N | 8.6763315562  | 10.1660667101 | 3.1824510496  |
| N | 2.7278891622  | 3.1526244292  | 10.4939285026 |
| N | 9.9173088870  | 9.9610104789  | 8.7902674013  |
| N | 10.8394752776 | 3.0525158750  | 2.9397174889  |
| N | 9.6854678324  | 2.5380613603  | 9.6802254574  |
| N | 2.6816688086  | 10.5912065734 | 4.1617716143  |
| I | 10.1280687960 | 13.4540656357 | 12.7488959790 |
| I | 7.0358126110  | 0.4107271405  | 2.8248720266  |
| I | 12.9751867036 | 13.9535770438 | 9.6304056520  |
| I | 7.2288298640  | 12.8558669183 | 9.3273366175  |
| I | 3.5269279847  | 6.2548140122  | 6.0298114304  |
| I | 9.7306768860  | 7.3872592676  | 6.1717209785  |
| I | 6.6303733507  | 6.2362933065  | 9.3825910145  |
| I | 7.0457701063  | 3.1784826717  | 12.2534784316 |
| I | 13.0672520718 | 10.1904395288 | 6.5575355888  |
| I | 6.6967196704  | 10.0450475847 | 0.1805588929  |
| I | 0.9263898675  | 6.0478872778  | 9.3958999266  |
| I | 12.7601871357 | 7.5184889603  | 2.8511341983  |
| I | 3.3841070314  | 6.9633468977  | 0.2165774925  |
| I | 10.1690109311 | 0.6877584001  | 5.6542890595  |
| I | 6.7771112736  | 6.8575919869  | 3.2134149643  |
| I | 12.5988200104 | 10.2138260113 | 11.4379467346 |

|   |               |               |               |
|---|---------------|---------------|---------------|
| I | 6.9147044261  | 3.3948111302  | 5.8489593913  |
| I | 0.7263845818  | 0.3181422091  | 3.0939024620  |
| I | 3.6148837199  | 0.3346929671  | -0.1119682275 |
| I | 10.0912051857 | 6.0606086125  | 12.0245312579 |
| I | 0.6447212650  | 3.3696341485  | 0.4043208341  |
| I | 0.4957670041  | 3.3432627745  | 6.0614543284  |
| I | 3.7268389013  | 12.9999482923 | 6.7251563548  |
| I | 6.4768556533  | 9.9010179460  | 6.3737382471  |

### (MA)<sub>3</sub>Ga<sub>2</sub>I<sub>9</sub>

|    |               |               |               |
|----|---------------|---------------|---------------|
| Ga | 1.0531780087  | 0.6661391631  | 0.4521001994  |
| Ga | 0.8969901656  | 5.9849290697  | 6.5874971379  |
| Ga | 6.2441460509  | 12.4821814939 | 6.8669048431  |
| Ga | 12.4948017303 | 12.8172183592 | 11.8919641748 |
| Ga | 7.4804116552  | 0.8696093764  | 5.3211522443  |
| Ga | 7.3128531575  | 5.8607370212  | 11.8544268849 |
| Ga | 12.5167881230 | 7.6910823034  | 5.5610157489  |
| Ga | 6.1871010746  | 7.3258593353  | 0.4073218568  |
| H  | 4.1543122283  | 10.5533549240 | 2.6046970694  |
| H  | 2.8770994496  | 9.3067768135  | 2.3933494910  |
| H  | 10.5983522023 | 9.6200129326  | 2.3577034124  |
| H  | 10.4935279378 | 3.1716470866  | 7.9430716600  |
| H  | 9.4718712486  | 4.4267828727  | 3.7415919459  |
| H  | 9.0278540978  | 3.4261155859  | 2.3274278173  |
| H  | 9.7321852058  | 11.1226810424 | 1.8593258398  |
| H  | 4.3200683420  | 2.0087788354  | 9.7197077413  |
| H  | 8.9775160481  | 10.4299788490 | 10.6203611968 |
| H  | 8.0526906936  | 9.4158355784  | 9.4555672732  |
| H  | 4.4747470617  | 3.6831850300  | 9.0871223819  |
| H  | 4.9121728694  | 4.2920603061  | 2.7783759456  |
| H  | 10.6536689673 | 4.3699862201  | 9.2770591002  |
| H  | 4.0062728178  | 10.6889809521 | 10.3389385631 |
| H  | 4.1676431305  | 9.0600759541  | 3.6093615155  |
| H  | 10.5703390352 | 11.0478872724 | 3.4453583346  |
| H  | 3.0442622979  | 2.6785662431  | 8.6461417787  |
| H  | 9.0844901550  | 4.1824069908  | 8.4265721258  |
| H  | 10.1904089590 | 4.7769606960  | 2.1304311367  |
| H  | 4.5082845058  | 2.6424383797  | 2.1783968404  |
| H  | 3.1603249831  | 10.2579836765 | 8.8155796467  |
| H  | 4.6056099434  | 9.3282831301  | 9.3303082337  |
| H  | 9.4167390654  | 8.6963690650  | 10.3877647165 |
| H  | 3.2484398982  | 3.9298206102  | 2.1967980318  |
| H  | 9.1931349323  | 3.0337681832  | 10.6327883821 |
| H  | 2.0023647863  | 9.4123264385  | 10.8108351742 |
| H  | 10.0133655449 | 9.2615217449  | 8.0553005750  |
| H  | 2.4125434430  | 2.7212606811  | 11.0246028361 |
| H  | 4.5860999081  | 2.8017153087  | 4.6206499823  |
| H  | 11.6945953529 | 3.5149314919  | 3.6924214315  |
| H  | 3.3799799229  | 3.9531725124  | 4.6193079368  |
| H  | 10.6386892957 | 2.2318246369  | 3.6592863336  |
| H  | 9.7064073393  | 10.8762948214 | 8.3752024249  |

|   |               |               |               |
|---|---------------|---------------|---------------|
| H | 8.2021786886  | 9.3762251051  | 2.6920067292  |
| H | 2.4411630014  | 4.2529369127  | 10.3518073883 |
| H | 3.3248685518  | 8.4568403642  | 11.2241402288 |
| H | 8.9715423008  | 9.3827280039  | 4.1771624758  |
| C | 3.7750639317  | 2.9127099004  | 9.4277224445  |
| C | 9.8335084068  | 3.9923303021  | 2.8052081067  |
| H | 2.0761278523  | 11.2140097633 | 3.6910848491  |
| C | 9.0349526151  | 9.6024861096  | 9.9032408966  |
| H | 2.0575815793  | 9.8424190813  | 4.6337205428  |
| H | 3.7003477417  | 3.7283674793  | 11.3604723831 |
| C | 3.5369228489  | 9.8036709654  | 3.1120401092  |
| H | 10.9512567461 | 10.1003218334 | 9.1931126388  |
| C | 3.7173603223  | 9.8690090718  | 9.6733832407  |
| C | 4.1312497366  | 3.5254967900  | 2.7049175528  |
| C | 10.0068273779 | 10.4756616081 | 2.7001224088  |
| H | 3.2464717813  | 10.9909048730 | 4.8562016838  |
| H | 10.4236367080 | 2.0509539480  | 10.0322553729 |
| C | 9.9825767390  | 3.6639001209  | 8.7770829538  |
| H | 11.4268930508 | 2.7273635775  | 2.2426742756  |
| H | 8.8746146756  | 1.9623117735  | 9.3933982826  |
| H | 2.4745641257  | 8.1610167361  | 9.8241270657  |
| H | 3.0269825837  | 2.3859511352  | 4.1062734175  |
| H | 8.1460686996  | 10.7545528264 | 3.6290523775  |
| N | 2.8422107622  | 8.9288912983  | 10.4221568737 |
| N | 3.7473414773  | 3.1279344426  | 4.0938181902  |
| N | 8.7591494807  | 9.9685569714  | 3.3418898079  |
| N | 3.0407387188  | 3.4368856446  | 10.6167616687 |
| N | 9.9865834491  | 9.9839693847  | 8.8118252352  |
| N | 10.9616284440 | 3.0605928147  | 3.1080049312  |
| N | 9.5910009447  | 2.6209780331  | 9.7671077493  |
| N | 2.6930351205  | 10.4894113386 | 4.1292713837  |
| I | 10.0373184194 | 13.3367890189 | 12.6268301957 |
| I | 6.9344568695  | 0.2976354709  | 2.8186270798  |
| I | 12.8732719232 | 14.0098949051 | 9.5675633047  |
| I | 7.0911732467  | 12.9599134194 | 9.3391600850  |
| I | 3.4085222911  | 6.3287032996  | 5.9063778324  |
| I | 9.9104424393  | 7.4903126232  | 6.0182102452  |
| I | 6.5260032227  | 6.3662173923  | 9.3932129283  |
| I | 6.7076969966  | 3.3192447896  | 12.3176989389 |
| I | 13.1364273637 | 10.0602246289 | 6.5907206925  |
| I | 6.5365396272  | 9.9133150833  | 0.1138261135  |
| I | 0.8433854472  | 6.0430925815  | 9.2719069003  |
| I | 12.9434117674 | 7.7413415767  | 2.9874804085  |
| I | 3.5604633774  | 6.8350037769  | 0.1434323979  |
| I | 10.0944081195 | 0.5359033339  | 5.6168807719  |
| I | 6.7603092568  | 6.8686295447  | 2.9383831436  |
| I | 12.6182266868 | 10.1933861939 | 11.3976629518 |
| I | 6.9801751421  | 3.4170847019  | 5.7658717715  |
| I | 0.6555232792  | 0.1415909511  | 3.0298982599  |
| I | 3.5361140543  | 0.2026339183  | -0.1543866717 |
| I | 9.9400074167  | 5.9787906122  | 11.9723390326 |
| I | 0.6188166884  | 3.3032867607  | 0.4069285368  |



|   |              |               |              |
|---|--------------|---------------|--------------|
| I | 0.2879015533 | 3.5010888501  | 5.8850073389 |
| I | 3.6378660232 | 12.9730396089 | 6.6831156049 |
| I | 6.4521686915 | 9.8994667611  | 6.4006819078 |

**(MA)<sub>3</sub>In<sub>2</sub>I<sub>9</sub>**

|    |               |               |               |
|----|---------------|---------------|---------------|
| In | 1.1016948193  | 0.5960266335  | 0.6543753344  |
| In | 1.1332899986  | 6.0182676250  | 6.9521654518  |
| In | 6.0246070534  | 12.3510967760 | 6.9503053551  |
| In | 12.4786602427 | 12.4503957612 | 11.8544990999 |
| In | 7.4717116280  | 1.1529009419  | 5.4694752451  |
| In | 7.4746266880  | 5.7923138235  | 11.7898325769 |
| In | 12.2202989740 | 7.5636416095  | 5.7768977914  |
| In | 6.1086796146  | 7.3054153417  | 0.6185317744  |
| H  | 3.8448767235  | 10.9528544418 | 2.8273816179  |
| H  | 2.9865980846  | 9.4968697724  | 2.1862339349  |
| H  | 10.4415993040 | 9.4630122240  | 2.7511024574  |
| H  | 10.9932949704 | 3.7414509369  | 8.1127523451  |
| H  | 9.3702824579  | 4.6100573436  | 3.6462747694  |
| H  | 8.8954841713  | 3.4390840020  | 2.3750327049  |
| H  | 10.1766109188 | 10.9118839892 | 1.7207880201  |
| H  | 4.2893316892  | 1.9754210629  | 9.3099317998  |
| H  | 8.8400382508  | 10.4189745179 | 10.5156081553 |
| H  | 7.8730846431  | 9.1657107493  | 9.6655608171  |
| H  | 4.5278419662  | 3.7339665108  | 9.5323682816  |
| H  | 5.0429263440  | 4.4129857290  | 2.4668426321  |
| H  | 10.5558821807 | 4.5755915726  | 9.6501560493  |
| H  | 4.6776349154  | 10.2061032137 | 9.8452236989  |
| H  | 4.3257547682  | 9.3037111009  | 3.3708466281  |
| H  | 10.6476982602 | 11.1061925457 | 3.4347828417  |
| H  | 3.2421397751  | 3.1408662979  | 8.4372616323  |
| H  | 9.2964726422  | 4.2151239967  | 8.4292136921  |
| H  | 9.9535536328  | 4.8392606860  | 1.9639441892  |
| H  | 4.5963553152  | 2.6920980030  | 2.2272839351  |
| H  | 3.1271684636  | 10.3315734708 | 8.9484893303  |
| H  | 4.0695625196  | 8.7998631780  | 8.9135504195  |
| H  | 9.2921939732  | 8.6873401340  | 10.6515345660 |
| H  | 3.3719824270  | 3.9785654663  | 1.9799101759  |
| H  | 9.2594260594  | 2.6229771315  | 10.2952535828 |
| H  | 2.6734765868  | 9.9566986972  | 11.2819564326 |
| H  | 9.7370242249  | 8.7012710350  | 8.2242294907  |
| H  | 2.0357670825  | 2.2488841996  | 10.2598167609 |
| H  | 4.6841287999  | 3.3550905050  | 4.6021635121  |
| H  | 11.6700758286 | 3.8996145976  | 3.3811269662  |
| H  | 3.4960858646  | 4.4828218450  | 4.3637897940  |
| H  | 10.7167757906 | 2.5788572449  | 3.7992265917  |
| H  | 9.4042124240  | 10.3196345898 | 8.1582103806  |
| H  | 8.0671665648  | 9.8781890639  | 2.5247536994  |
| H  | 2.3625493669  | 3.8481671943  | 10.6315451928 |
| H  | 3.6182101008  | 8.5831203765  | 11.3505156420 |
| H  | 8.4651405192  | 10.2479596619 | 4.1022137225  |
| C  | 3.7904053825  | 2.9468016450  | 9.3609524555  |

|   |               |               |               |
|---|---------------|---------------|---------------|
| C | 9.6902803097  | 4.1034372197  | 2.7320601810  |
| H | 1.6524233260  | 10.5305314673 | 3.8932005994  |
| C | 8.8710115433  | 9.4580139782  | 9.9977928696  |
| H | 2.2589518729  | 9.0838030385  | 4.5306135418  |
| H | 3.2463606909  | 2.5859085371  | 11.3656512671 |
| C | 3.4904048895  | 9.9417552162  | 3.0531052947  |
| H | 10.7261588463 | 9.7826679752  | 9.0533763426  |
| C | 3.7834976586  | 9.6652146683  | 9.5186697826  |
| C | 4.2441401493  | 3.6715765306  | 2.5626023373  |
| C | 10.0761967248 | 10.4952983361 | 2.7283964033  |
| H | 2.8961017326  | 10.5734587670 | 4.9878339560  |
| H | 10.8601297014 | 2.1598873461  | 9.9396785909  |
| C | 10.2274922414 | 3.8658627261  | 8.8843057719  |
| H | 11.2767924941 | 2.8031234641  | 2.2136678986  |
| H | 9.6550623976  | 1.8506817140  | 8.8515763698  |
| H | 2.2256897764  | 8.5946831274  | 10.4513257326 |
| H | 3.1207128956  | 2.8696661911  | 4.1640876285  |
| H | 8.2148129145  | 11.4766372772 | 2.9837590734  |
| N | 3.0443861529  | 9.1788197516  | 10.7177104885 |
| N | 3.8565875643  | 3.5766936712  | 3.9965728818  |
| N | 8.6322965935  | 10.5216496208 | 3.1123544853  |
| N | 2.8095393810  | 2.9157443184  | 10.4836542859 |
| N | 9.7401510071  | 9.5799590013  | 8.7935117987  |
| N | 10.9045678327 | 3.2876761644  | 3.0517083874  |
| N | 9.9811897223  | 2.5497919517  | 9.5411463572  |
| N | 2.5142163463  | 10.0247502775 | 4.1801366630  |
| I | 9.8234477492  | 13.0652874269 | 12.4229748140 |
| I | 7.2298129881  | 0.7701747688  | 2.6825030805  |
| I | 13.1097118763 | 13.7997329578 | 9.4053965203  |
| I | 6.6635246092  | 12.6710468700 | 9.6448117517  |
| I | 3.6167131452  | 6.7936953561  | 5.8340443068  |
| I | 9.6187723463  | 6.7824247905  | 6.4407092666  |
| I | 6.4180886229  | 6.4507922020  | 9.2733192356  |
| I | 7.1249953239  | 3.0053571894  | 11.8719349521 |
| I | 12.3797072806 | 10.3101650873 | 6.3909002711  |
| I | 6.4147691709  | 10.0728721604 | 0.1362124633  |
| I | 1.2742548637  | 6.0579012050  | 9.7733136419  |
| I | 12.6478118909 | 7.2694903010  | 3.0254844151  |
| I | 3.2984247557  | 6.8677005258  | 0.3807978444  |
| I | 10.2596864378 | 1.0818720522  | 5.9737571673  |
| I | 6.9260800681  | 7.0245876345  | 3.2700385783  |
| I | 12.5798571200 | 9.7358953454  | 11.1628672256 |
| I | 6.7192922132  | 3.7819370167  | 6.0595172940  |
| I | 0.5494277371  | -0.0803056372 | 3.3259864231  |
| I | 3.8145015750  | 0.3716852145  | -0.0031499179 |
| I | 10.2586816708 | 6.1760888195  | 12.1147268138 |
| I | 0.5083675028  | 3.3610125456  | 0.5584334282  |
| I | 0.8763085221  | 3.3246880519  | 6.1071223031  |
| I | 3.2359791902  | 12.4936326121 | 6.6512308501  |
| I | 6.8576565635  | 9.7537849222  | 6.2879197347  |

**(MA)<sub>3</sub>Bi<sub>2</sub>I<sub>9</sub>**

|    |          |           |           |
|----|----------|-----------|-----------|
| Bi | 5.403404 | 11.394726 | 7.593128  |
| Bi | 5.403404 | 3.337954  | 14.124978 |
| Bi | 5.403404 | 11.394726 | 3.265925  |
| Bi | 5.403404 | 3.337954  | 18.452181 |
| Bi | 0.000000 | 4.028386  | 7.593128  |
| Bi | 0.000000 | 10.704294 | 14.124978 |
| Bi | 0.000000 | 4.028386  | 3.265925  |
| Bi | 0.000000 | 10.704294 | 18.452181 |
| H  | 6.279815 | 3.933139  | 5.429526  |
| H  | 6.279815 | 10.799541 | 16.288579 |
| H  | 4.526993 | 10.799541 | 16.288579 |
| H  | 4.526993 | 3.933139  | 5.429526  |
| H  | 7.443962 | 2.085330  | 8.911156  |
| H  | 7.443962 | 12.647350 | 12.806950 |
| H  | 7.443962 | 2.085330  | 1.947897  |
| H  | 7.443962 | 12.647350 | 19.770209 |
| H  | 3.362846 | 12.647350 | 12.806950 |
| H  | 3.362846 | 2.085330  | 8.911156  |
| H  | 3.362846 | 12.647350 | 19.770209 |
| H  | 3.362846 | 2.085330  | 1.947897  |
| H  | 6.587776 | 0.758645  | 8.213136  |
| H  | 6.587776 | 13.974035 | 13.504970 |
| H  | 6.587776 | 0.758645  | 2.645917  |
| H  | 6.587776 | 13.974035 | 19.072189 |
| H  | 4.219032 | 13.974035 | 13.504970 |
| H  | 4.219032 | 0.758645  | 8.213136  |
| H  | 4.219032 | 13.974035 | 19.072189 |
| H  | 4.219032 | 0.758645  | 2.645917  |
| H  | 4.532624 | 3.929869  | 9.779403  |
| H  | 4.532624 | 10.802811 | 11.938703 |
| H  | 4.532624 | 3.929869  | 1.079650  |
| H  | 4.532624 | 10.802811 | 20.638456 |
| H  | 6.274184 | 10.802811 | 11.938703 |
| H  | 6.274184 | 3.929869  | 9.779403  |
| H  | 6.274184 | 10.802811 | 20.638456 |
| H  | 6.274184 | 3.929869  | 1.079650  |
| H  | 8.760198 | 13.335101 | 5.429526  |
| H  | 8.760198 | 1.397579  | 16.288579 |
| H  | 2.046610 | 1.397579  | 16.288579 |
| H  | 2.046610 | 13.335101 | 5.429526  |
| H  | 9.614444 | 0.109854  | 5.429526  |
| H  | 9.614444 | 14.622826 | 16.288579 |
| H  | 1.192364 | 14.622826 | 16.288579 |
| H  | 1.192364 | 0.109854  | 5.429526  |
| H  | 0.876411 | 11.299479 | 5.429526  |
| H  | 0.876411 | 3.433201  | 16.288579 |
| H  | 9.930397 | 3.433201  | 16.288579 |
| H  | 9.930397 | 11.299479 | 5.429526  |
| H  | 2.040558 | 9.451670  | 8.911156  |
| H  | 2.040558 | 5.281010  | 12.806950 |

|   |          |           |           |
|---|----------|-----------|-----------|
| H | 2.040558 | 9.451670  | 1.947897  |
| H | 2.040558 | 5.281010  | 19.770209 |
| H | 8.766250 | 5.281010  | 12.806950 |
| H | 8.766250 | 9.451670  | 8.911156  |
| H | 8.766250 | 5.281010  | 19.770209 |
| H | 8.766250 | 9.451670  | 1.947897  |
| H | 1.184372 | 8.124985  | 8.213136  |
| H | 1.184372 | 6.607695  | 13.504970 |
| H | 1.184372 | 8.124985  | 2.645917  |
| H | 1.184372 | 6.607695  | 19.072189 |
| H | 9.622436 | 6.607695  | 13.504970 |
| H | 9.622436 | 8.124985  | 8.213136  |
| H | 9.622436 | 6.607695  | 19.072189 |
| H | 9.622436 | 8.124985  | 2.645917  |
| H | 9.936028 | 11.296209 | 9.779403  |
| H | 9.936028 | 3.436471  | 11.938703 |
| H | 9.936028 | 11.296209 | 1.079650  |
| H | 9.936028 | 3.436471  | 20.638456 |
| H | 0.870780 | 3.436471  | 11.938703 |
| H | 0.870780 | 11.296209 | 9.779403  |
| H | 0.870780 | 3.436471  | 20.638456 |
| H | 0.870780 | 11.296209 | 1.079650  |
| H | 3.356794 | 5.968761  | 5.429526  |
| H | 3.356794 | 8.763919  | 16.288579 |
| H | 7.450014 | 8.763919  | 16.288579 |
| H | 7.450014 | 5.968761  | 5.429526  |
| H | 4.211040 | 7.476194  | 5.429526  |
| H | 4.211040 | 7.256486  | 16.288579 |
| H | 6.595768 | 7.256486  | 16.288579 |
| H | 6.595768 | 7.476194  | 5.429526  |
| C | 5.403404 | 2.284464  | 8.918084  |
| C | 5.403404 | 12.448216 | 12.800022 |
| C | 5.403404 | 2.284464  | 1.940969  |
| C | 5.403404 | 12.448216 | 19.777137 |
| C | 5.403404 | 5.790930  | 5.429526  |
| C | 5.403404 | 8.941750  | 16.288579 |
| C | 0.000000 | 9.650804  | 8.918084  |
| C | 0.000000 | 5.081876  | 12.800022 |
| C | 0.000000 | 9.650804  | 1.940969  |
| C | 0.000000 | 5.081876  | 19.777137 |
| C | 0.000000 | 13.157270 | 5.429526  |
| C | 0.000000 | 1.575410  | 16.288579 |
| I | 2.102021 | 2.753081  | 5.429526  |
| I | 2.102021 | 11.979599 | 16.288579 |
| I | 8.704787 | 11.979599 | 16.288579 |
| I | 8.704787 | 2.753081  | 5.429526  |
| I | 5.403404 | 13.915738 | 5.429526  |
| I | 5.403404 | 0.816942  | 16.288579 |
| I | 3.203451 | 12.732792 | 9.133072  |
| I | 3.203451 | 1.999888  | 12.585034 |
| I | 3.203451 | 12.732792 | 1.725981  |
| I | 3.203451 | 1.999888  | 19.992125 |

|   |          |           |           |
|---|----------|-----------|-----------|
| I | 7.603357 | 1.999888  | 12.585034 |
| I | 7.603357 | 12.732792 | 9.133072  |
| I | 7.603357 | 1.999888  | 19.992125 |
| I | 7.603357 | 12.732792 | 1.725981  |
| I | 5.403404 | 8.869795  | 9.154160  |
| I | 5.403404 | 5.862885  | 12.563946 |
| I | 5.403404 | 8.869795  | 1.704893  |
| I | 5.403404 | 5.862885  | 20.013213 |
| I | 7.505425 | 10.119421 | 5.429526  |
| I | 7.505425 | 4.613259  | 16.288579 |
| I | 3.301383 | 4.613259  | 16.288579 |
| I | 3.301383 | 10.119421 | 5.429526  |
| I | 0.000000 | 6.549398  | 5.429526  |
| I | 0.000000 | 8.183282  | 16.288579 |
| I | 8.606855 | 5.366452  | 9.133072  |
| I | 8.606855 | 9.366228  | 12.585034 |
| I | 8.606855 | 5.366452  | 1.725981  |
| I | 8.606855 | 9.366228  | 19.992125 |
| I | 2.199953 | 9.366228  | 12.585034 |
| I | 2.199953 | 5.366452  | 9.133072  |
| I | 2.199953 | 9.366228  | 19.992125 |
| I | 2.199953 | 5.366452  | 1.725981  |
| I | 0.000000 | 1.503455  | 9.154160  |
| I | 0.000000 | 13.229225 | 12.563946 |
| I | 0.000000 | 1.503455  | 1.704893  |
| I | 0.000000 | 13.229225 | 20.013213 |
| N | 5.403404 | 4.453439  | 5.429526  |
| N | 5.403404 | 10.279241 | 16.288579 |
| N | 6.563953 | 1.708217  | 8.573548  |
| N | 6.563953 | 13.024463 | 13.144558 |
| N | 6.563953 | 1.708217  | 2.285505  |
| N | 6.563953 | 13.024463 | 19.432601 |
| N | 4.242855 | 13.024463 | 13.144558 |
| N | 4.242855 | 1.708217  | 8.573548  |
| N | 4.242855 | 13.024463 | 19.432601 |
| N | 4.242855 | 1.708217  | 2.285505  |
| N | 5.403404 | 3.448022  | 9.567238  |
| N | 5.403404 | 11.284658 | 12.150868 |
| N | 5.403404 | 3.448022  | 1.291815  |
| N | 5.403404 | 11.284658 | 20.426291 |
| N | 9.648453 | 13.824801 | 5.429526  |
| N | 9.648453 | 0.907879  | 16.288579 |
| N | 1.158355 | 0.907879  | 16.288579 |
| N | 1.158355 | 13.824801 | 5.429526  |
| N | 0.000000 | 11.819779 | 5.429526  |
| N | 0.000000 | 2.912901  | 16.288579 |
| N | 1.160549 | 9.074557  | 8.573548  |
| N | 1.160549 | 5.658123  | 13.144558 |
| N | 1.160549 | 9.074557  | 2.285505  |
| N | 1.160549 | 5.658123  | 19.432601 |
| N | 9.646259 | 5.658123  | 13.144558 |
| N | 9.646259 | 9.074557  | 8.573548  |

N 9.646259 5.658123 19.432601  
 N 9.646259 9.074557 2.285505  
 N 0.000000 10.814362 9.567238  
 N 0.000000 3.918318 12.150868  
 N 0.000000 10.814362 1.291815  
 N 0.000000 3.918318 20.426291  
 N 4.245049 6.458461 5.429526  
 N 4.245049 8.274219 16.288579  
 N 6.561759 8.274219 16.288579  
 N 6.561759 6.458461 5.429526

**Table S2: Calculated band gaps of all the compounds using PAW pseudopotential :**

| Compounds                                                                            | CBM (eV) | VBM (eV) | Band Gaps (eV) | Band gaps obtained through USPP (eV) |
|--------------------------------------------------------------------------------------|----------|----------|----------------|--------------------------------------|
| (MA) <sub>3</sub> (Ga <sub>.25</sub> In <sub>.75</sub> ) <sub>2</sub> I <sub>9</sub> | 3.3392   | 1.1700   | 2.17           | 2.16                                 |
| (MA) <sub>3</sub> (Ga <sub>.50</sub> In <sub>.50</sub> ) <sub>2</sub> I <sub>9</sub> | 2.8966   | 0.9147   | 1.98           | 2.10                                 |
| (MA) <sub>3</sub> (Ga <sub>.75</sub> In <sub>.25</sub> ) <sub>2</sub> I <sub>9</sub> | 2.9973   | 0.8115   | 2.19           | 2.22                                 |
| (MA) <sub>3</sub> Ga <sub>2</sub> I <sub>9</sub>                                     | 2.8953   | 0.6714   | 2.23           | 2.31                                 |
| (MA) <sub>3</sub> In <sub>2</sub> I <sub>9</sub>                                     | 3.2300   | 1.1617   | 2.06           | 2.03                                 |

**Table S3: Calculated lattice vectors, crystallographic angles, the reciprocal lattice vectors, and the space group of the relaxed structures:**

| Compounds                                                                            | Lattice Vectors (Å) | Crystallographic angles (°) | Reciprocal lattice vectors (Å) | Space group |
|--------------------------------------------------------------------------------------|---------------------|-----------------------------|--------------------------------|-------------|
|                                                                                      | a=b=c               | $\alpha=\beta=\gamma$       | a'=b'=c'                       |             |
| (MA) <sub>3</sub> (Ga <sub>.25</sub> In <sub>.75</sub> ) <sub>2</sub> I <sub>9</sub> | 13.05               | 90                          | 0.08                           | P 1         |
| (MA) <sub>3</sub> (Ga <sub>.50</sub> In <sub>.50</sub> ) <sub>2</sub> I <sub>9</sub> | 13.05               | 90                          | 0.08                           |             |
| (MA) <sub>3</sub> (Ga <sub>.75</sub> In <sub>.25</sub> ) <sub>2</sub> I <sub>9</sub> | 13.05               | 90                          | 0.08                           |             |
| (MA) <sub>3</sub> Ga <sub>2</sub> I <sub>9</sub>                                     | 13.05               | 90                          | 0.08                           |             |
| (MA) <sub>3</sub> In <sub>2</sub> I <sub>9</sub>                                     | 13.05               | 90                          | 0.08                           |             |
